# Supplementary material
Source: publisher site journal article supplement (https://www.dovepress.com/article/499598)
Supplement: Supplementary file 1 [file 499598-revised-supplementary-material.pdf › 499598-revised-supplementary-material.pdf]

**Table S1. Primers for RT-qPCR**

| <b>Primers</b>       | <b>Sequence (5'- 3')</b> |
|----------------------|--------------------------|
| ABCA1 Forward        | CGTTTCCGGGAAGTGTCTTA     |
| ABCA1 Reverse        | GCTAGAGATGACAAGGAGGATGGA |
| ABCG5 Forward        | TGGATCCAACACCTCTATGCTAAA |
| ABCG5 Reverse        | GGCAGGTTTTCTCGATGAACTG   |
| ABCG8 Forward        | TGCCCACCTTCCACATGTC      |
| ABCG8 Reverse        | ATGAAGCCGGCAGTAAGGTAGA   |
| CYP7A1 Forward       | CTGGGGATTTCGTGTAGCTGG    |
| CYP7A1 Reverse       | AGAGCATGTCGAAACTTCCCTA   |
| LXR $\alpha$ Forward | GAGTCTTGGGTCGCCAGTAG     |
| LXR $\alpha$ Reverse | AAGACACTGTCCTGGCCTTC     |

Figure S1

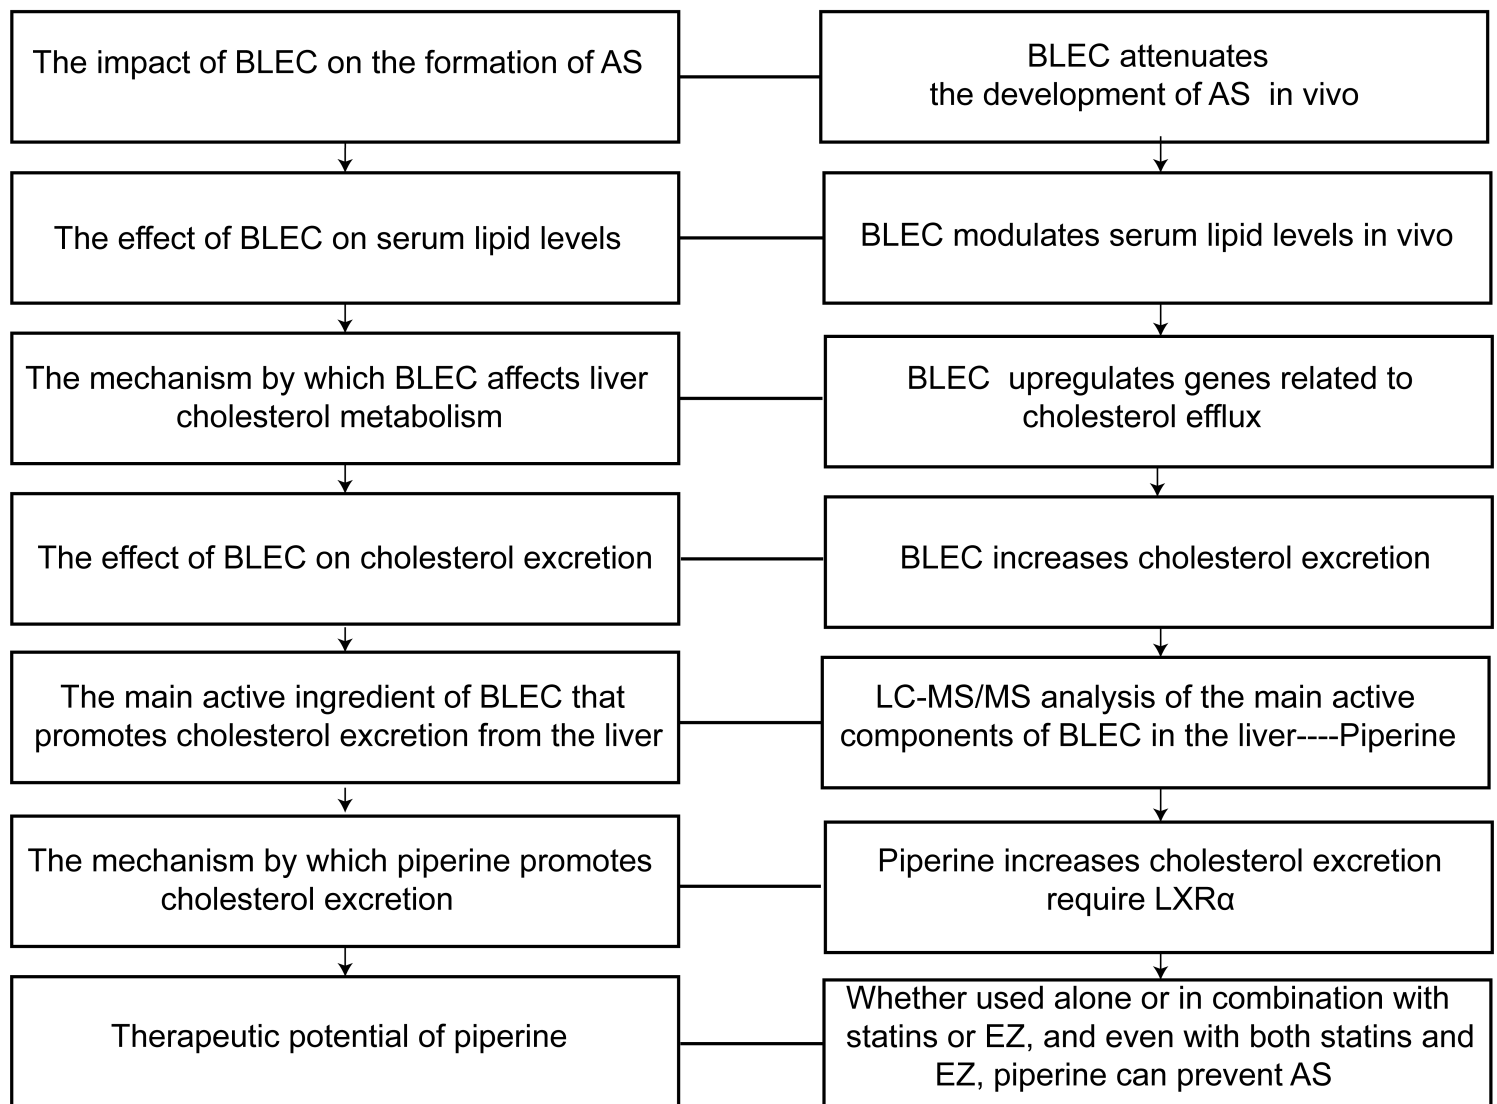

Figure S2

A

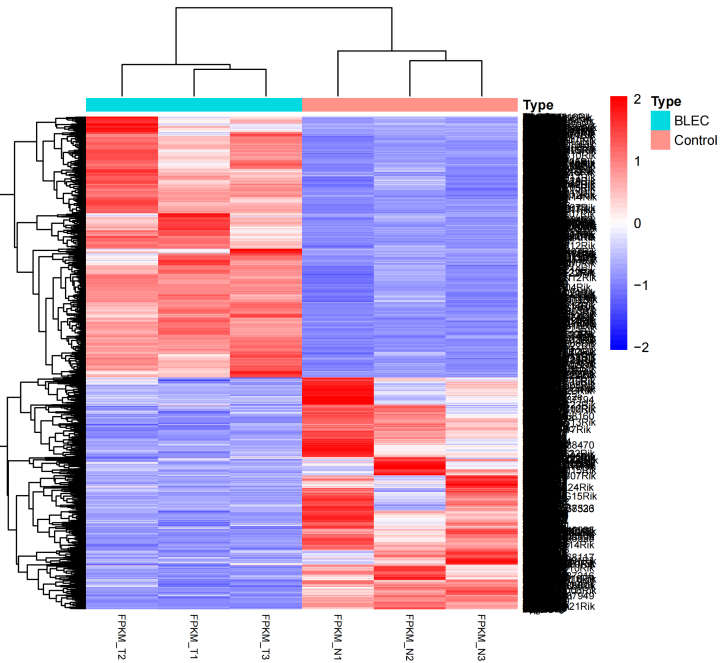

B

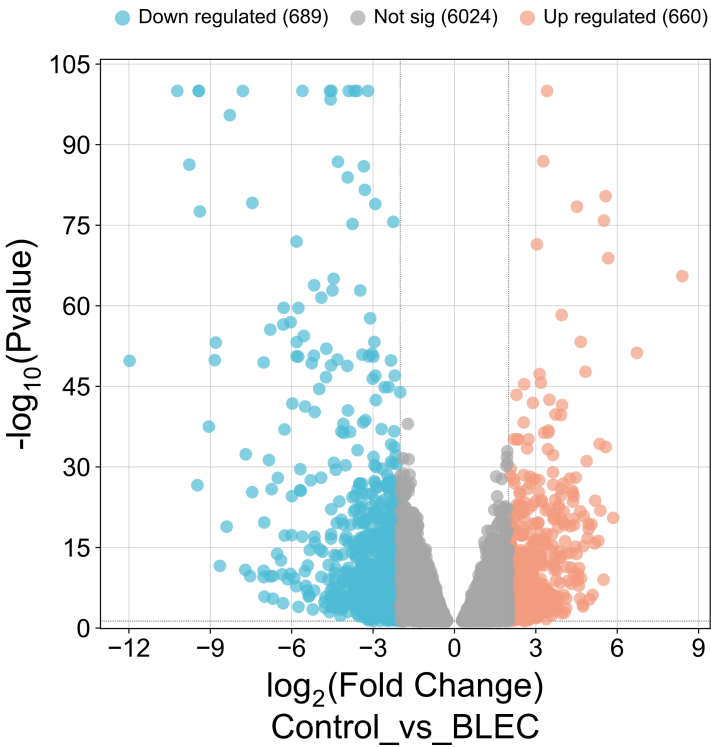

Figure S3

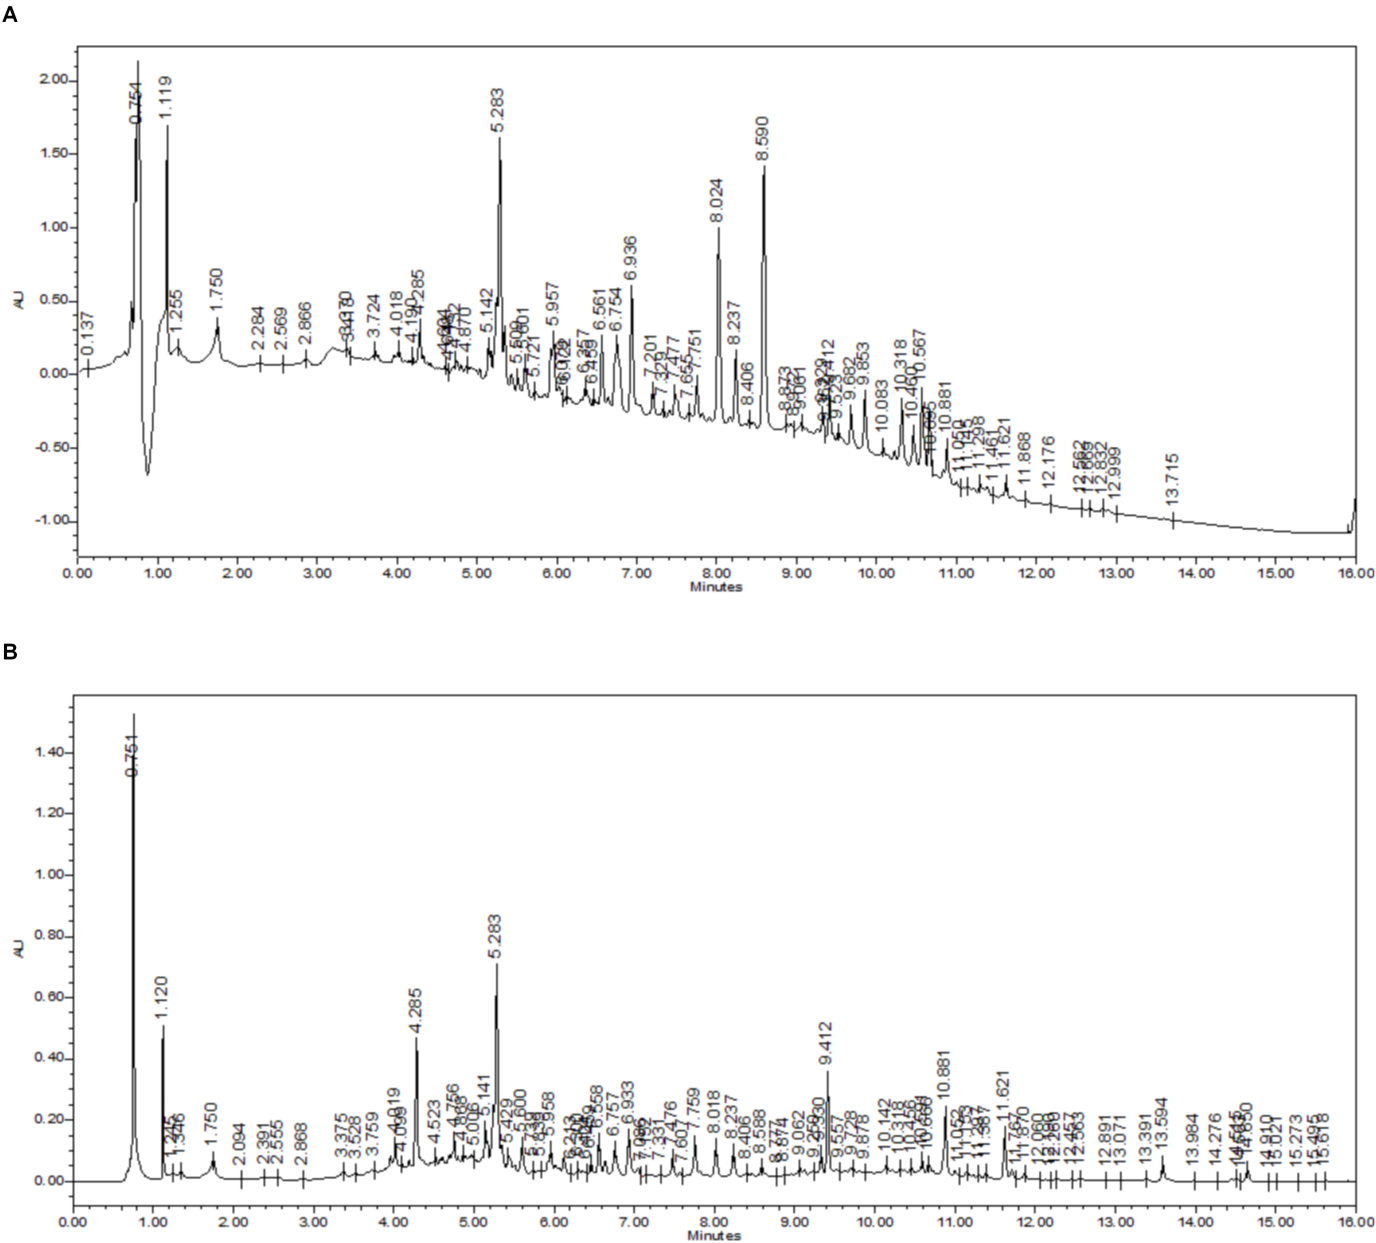



Figure S4

A

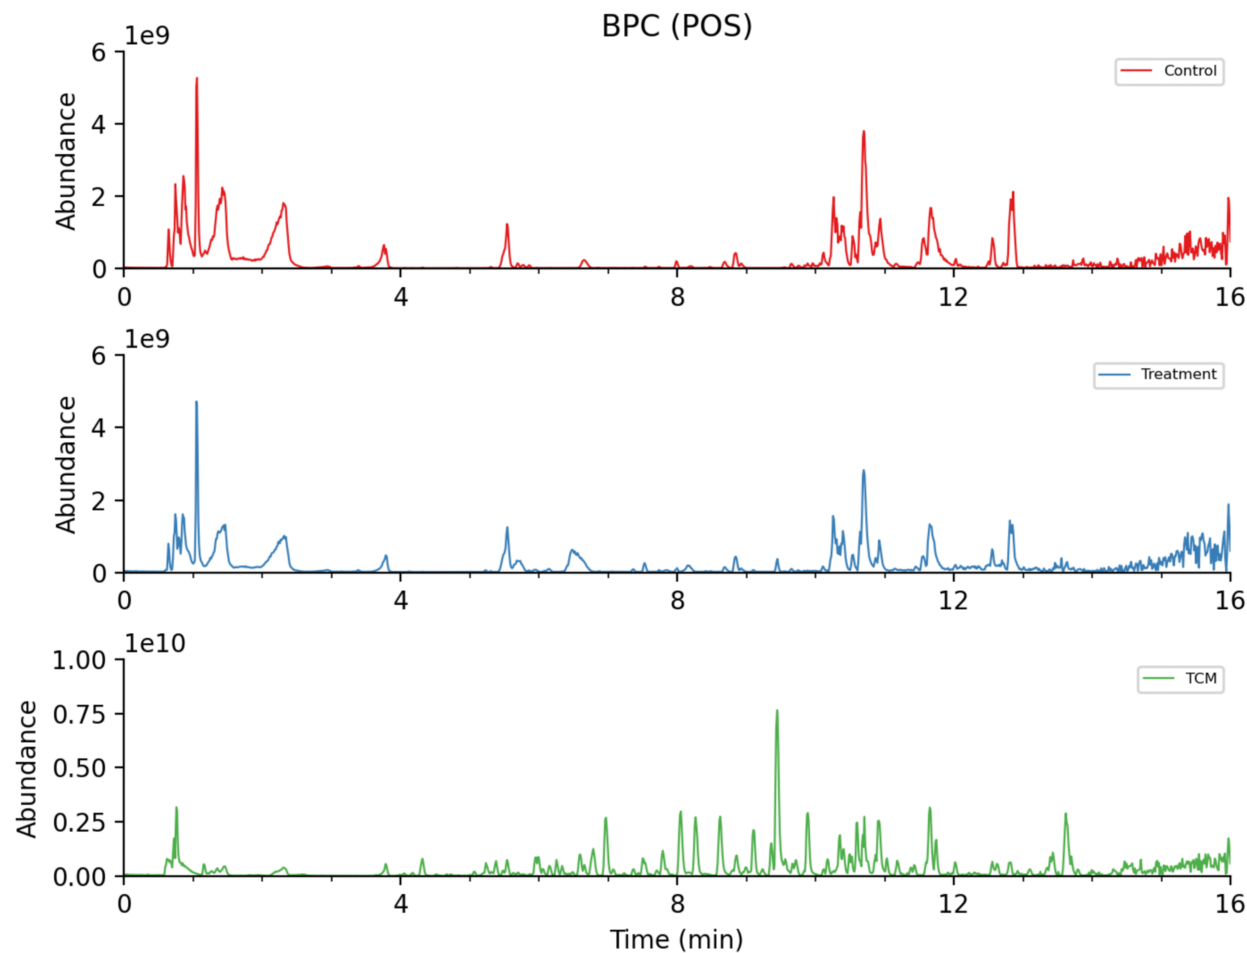

B

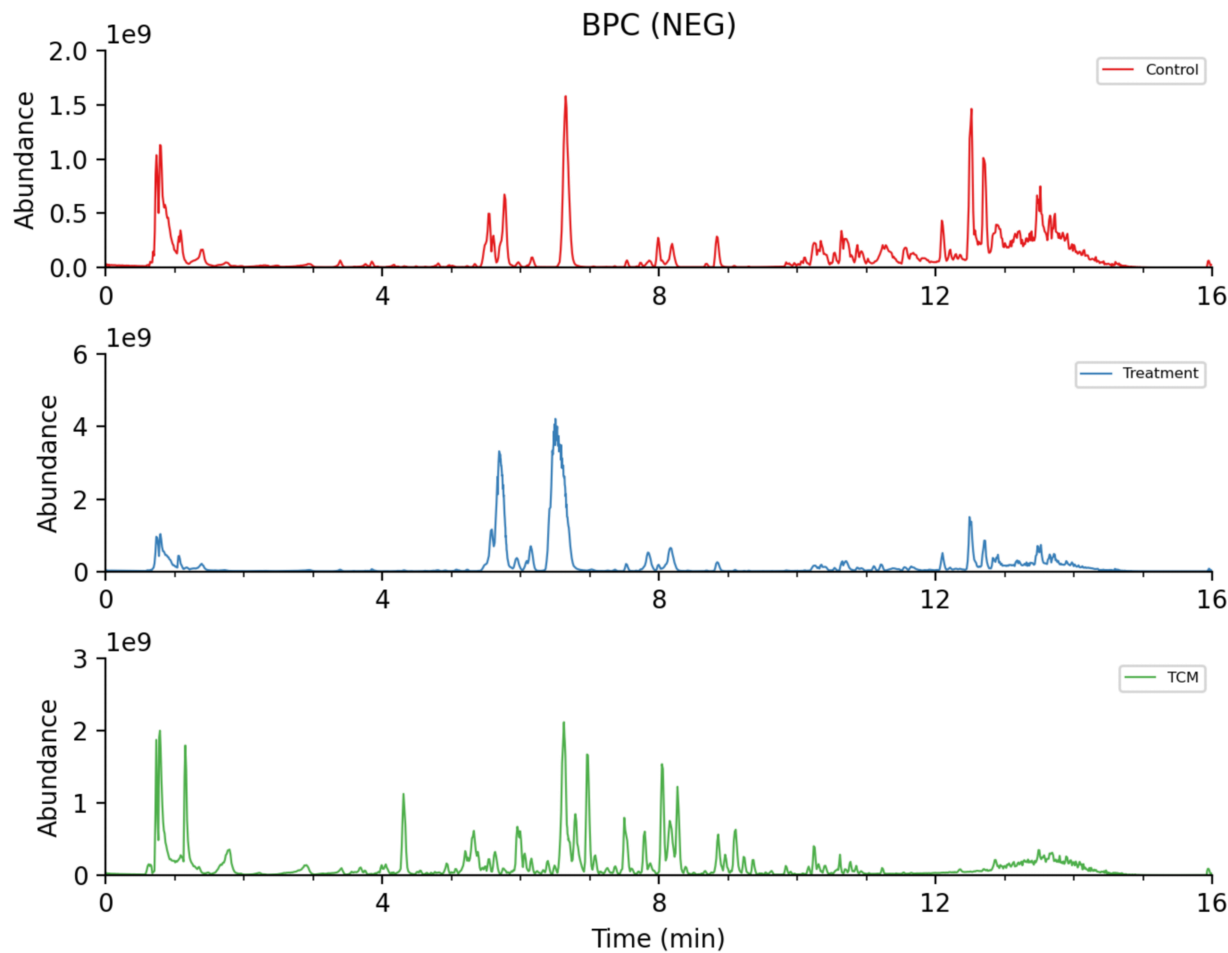

Figure S5

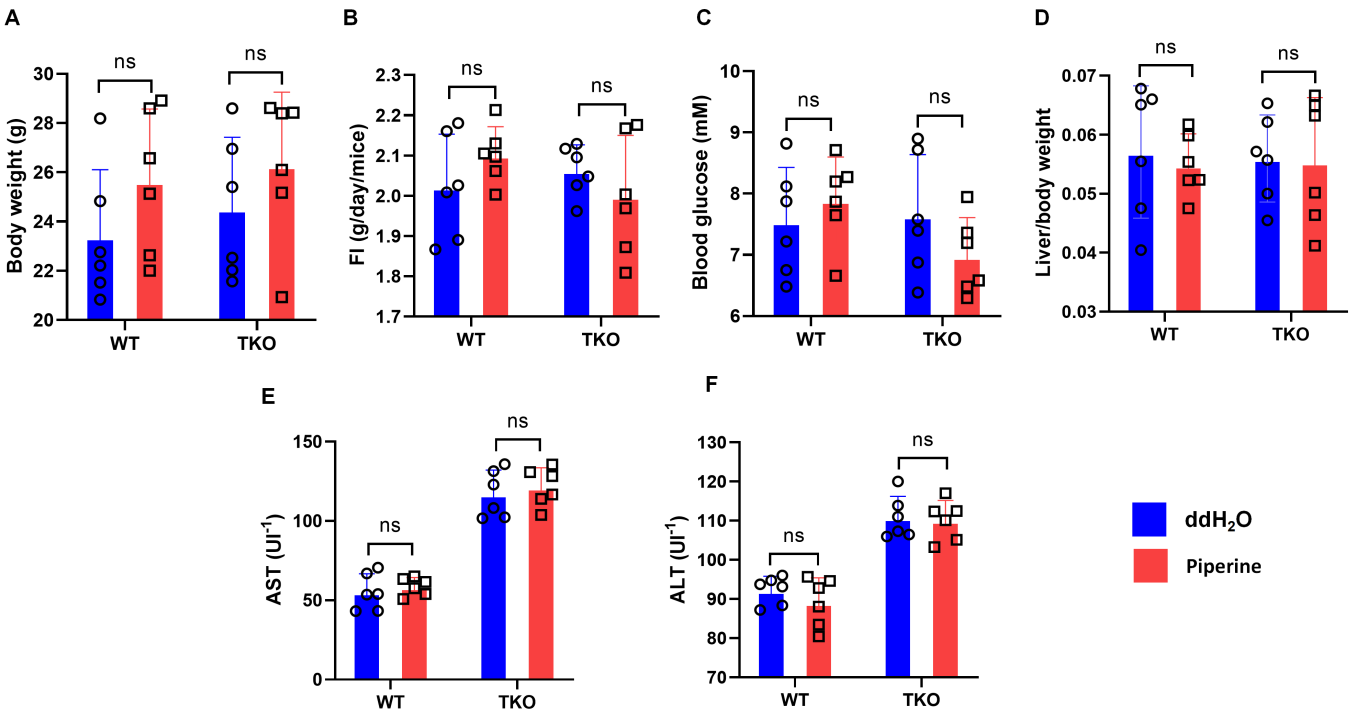

Figure S6

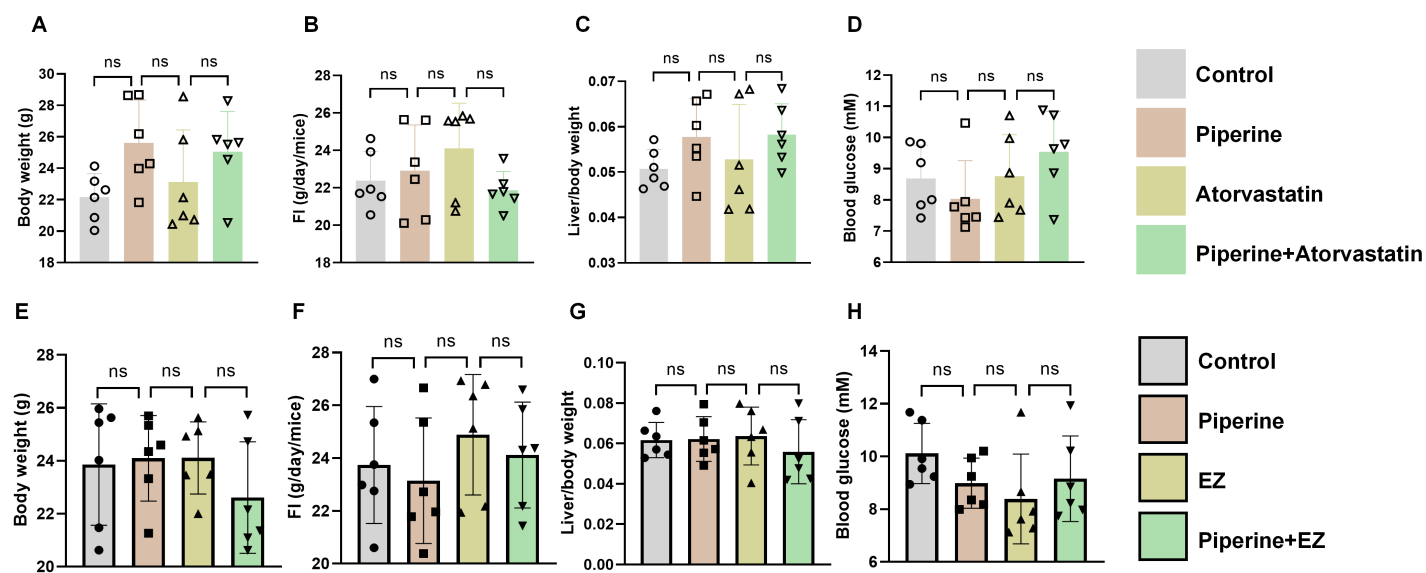

## Figure legend

**Fig S1.** The project flowchart about study design.

**Fig S2.** Transcriptomic analysis of differential transcripts between different groups. **A.** Heatmap of transcripts in different groups. **B.** Volcano plot of differentially expressed transcripts in BLEC-treated mice vs. control mice.

**Fig S3.** Analysis of BLEC components in the test solution by UPLC-MS. **A.** Chromatogram (210 nm). **B.** Chromatogram (254 nm).

**Fig S4.** Base-peak intensity (BPI) chromatograms of BLEC obtained by UPLC-MS/MS analysis.

**A:** positive-ion scan, and **B:** negative-ion scan.

**Fig S5. Piperine increases cholesterol excretion require LXR $\alpha$ .** ApoE<sup>-/-</sup> mice with liver LXR $\alpha$ -specific knockout (TKO) and ApoE<sup>-/-</sup> mice (WT) fed a high-fat diet (HFD) for 8 weeks and administrated with piperine (30mg/kg/day) and ddH<sub>2</sub>O through gavag for 4 weeks. **A.** Body weight. **B.** Food intake (FI). **C.** Blood glucose. **D.** Liver-to-body weight ratio. **E.** Serum levels of AST. **F.** Serum levels of ALT. Data are mean $\pm$ SD from N=6 mice per group. \*P < 0.05, \*\*P < 0.01 and \*\*\*P < 0.001 by unpaired two-tailed *t* test.

**Fig S6. Piperine synergizes with statin/ezetimibe.** Some 8-week-old male ApoE<sup>-/-</sup> mice were randomly grouped and fed a high-fat diet (HFD) for 8 weeks. Mice were gavaged with ddH<sub>2</sub>O, piperine (30mg/kg/day), atorvastatin (30mg/kg/day) or piperine and atorvastatin for 4 weeks. **A.** Body weight. **B.** Food intake (FI). **C.** Liver-to-body weight ratio. **D.** Blood glucose. Some 8-week-old male ApoE<sup>-/-</sup> mice were randomly grouped and fed a HFD for 8 weeks. Mice were gavaged with ddH<sub>2</sub>O, piperine (30mg/kg/day), EZ (10mg/kg/day) or piperine and EZ for 4 weeks. **E.** Body weight. **F.** FI. **G.** Liver-to-body weight ratio. **H.** Blood glucose. Data are mean $\pm$ SD from N=6 mice per group. \*P < 0.05, \*\*P < 0.01 and \*\*\*P < 0.001 by one-way ANOVA.
